# Supplementary material
Source: ML conference proceedings conference paper supplement (https://openreview.net/forum?id=de11dbHzAMF)
Supplement: supplementary_material [file attachment]

## A APPENDIX

598

## A.1 SUMMARY OF ACRONYMS

599

Acronyms of datasets and descriptions can be found below in section A.3

600

Table 6: List of acronyms used in this paper.

| Acronym | Description                                                                                            |
|---------|--------------------------------------------------------------------------------------------------------|
| ARLM    | Autoregressive Language Models                                                                         |
| CA-MTL  | Conditional Adaptive Multi-Task Learning: our architecture                                             |
| CFF     | Conditional Feed-Forward: a feed forward layer modulated by a conditioning vector                      |
| CLN     | Conditional Layer Normalization in section 2.3                                                         |
| EDM     | Evolutionary Data Measures (Collins et al., 2018): a task difficulty estimate                          |
| GLUE    | General Language Understanding Evaluation Wang et al. (2018): a benchmark with multiple datasets       |
| QA      | Question Answering                                                                                     |
| MT      | Multi-Task                                                                                             |
| MTAL    | Multi-Task Active Learning: finding the most informative instance for multiple learners (or models)    |
| MLM     | Masked Language Model: BERT Devlin et al. (2018) is an example of an MLM                               |
| MTL     | Multi-Task Learning: "learning tasks in parallel while using a shared representation" (Caruana, 1997)  |
| MRQA    | Machine Reading for Question Answering Fisch et al. (2019): a benchmark with multiple datasets         |
| NLP     | Natural Language Processing                                                                            |
| SOTA    | State of the art                                                                                       |
| ST      | Single Task finetuning: all weights are typically updated                                              |
| ST-A    | ST with Adapter modules: one adapter per task is trained and pretrained weights are optionally updated |

## A.2 UNCERTAINTY SAMPLING: ALGORITHM AND ADDITIONAL RESULTS

601

**Algorithm 1:** Multi-task Uncertainty Sampling

**Input:** Training data  $D_t$  for task  $t \in [1, \dots, T]$ ; batch size  $b$ ;  $C_t$  possible output classes for task  $t$ ;  $f := f_{\phi(\mathbf{z}_i), \theta_i}$  our model with weights  $\phi, \theta_i$ ;

**Output:**  $\mathcal{B}'$  - multi-task batch of size  $b$

```

1  $\mathcal{B} \leftarrow \emptyset$ 
2 for  $t \leftarrow 1$  to  $T$  do
3   Generate  $\mathbf{x}_t := \{x_{t,1}, \dots, x_{t,b}\} \stackrel{\text{i.i.d.}}{\sim} D_t$ 
4   for  $i \leftarrow 1$  to  $b$  do
5      $\mathcal{H}_{t,i} \leftarrow -\sum_{c=1}^{C_t} p_c(f(x_{t,i})) \log p_c(f(x_{t,i}))$  ▷ Entropy of each sample
6   end
7   Compute  $\bar{\mathcal{H}}_t \leftarrow \frac{1}{b} \sum_{\mathbf{x} \in \mathbf{x}_t} \mathcal{H}_{t,i}$  ▷ Average entropy for task  $t$ 
8   Compute  $H'_t \leftarrow -\sum_{c=1}^{C_t} \frac{1}{C_t} \log \left[ \frac{1}{C_t} \right]$  ▷ Max entropy (uniform distribution)
9
10   $\mathcal{B} \leftarrow \mathcal{B} \cup \mathbf{x}_t$  and  $D_t \leftarrow D_t \setminus \mathbf{x}_t$ 
11  if  $D_t = \emptyset$  then
12    Reload  $D_t$ 
13  end
14  for  $i \leftarrow 1$  to  $b$  do
15    Compute:  $\mathcal{U}_{t,i} \leftarrow \mathcal{H}_{t,i} / H'_t$  ▷ Uncertainty normalized with max entropy
16  end
17 end
18
19 Compute  $\hat{\mathcal{H}} \leftarrow \max_{i \in \{1, \dots, T\}} [\bar{\mathcal{H}}_i]$  ▷ Entropy of task with highest average entropy
20 Update  $\mathcal{U}_{t,i} \leftarrow \mathcal{U}_{t,i} / \hat{\mathcal{H}}$  ▷ Normalize each sample's uncertainty measure
21  $\mathcal{B}' \leftarrow \text{top\_b}(\{\mathcal{U}_{t,i} | t \in [1, \dots, T], i \in [1, \dots, b]\})$  ▷  $b$  samples w/ highest uncertainty
Return: With  $\mathcal{B}'$ , solve eq. 1 with gradient descent; updated model  $f$ 

```

602

An advantage of our MT-Uncertainty Sampling approach is its ability to manage task difficulty. This is highlighted in Figure 6. In this experiment, we estimated task difficulty using the Evolutionary Data Measures (EDM)<sup>4</sup> proposed by Collins et al. (2018). The task difficulty estimate relies on multiple dataset statistics such as the data size, class diversity, class balance and class interference. Interestingly, estimated task difficulty correlates with the first instance that the selection of a specific task occurs. Supposing that QNLI is an outlier, we notice that peaks in the data occur whenever tasks are first selected by MT Uncertainty sampling. This process follows the following order: 1. MNLI 2. CoLA 3. RTE 4. QQP 5. MRPC 6. SST-2, which is the order from highest task difficulty to lowest task difficulty using EDM. As opposed to Curriculum Learning (Bengio et al. 2009), MT-Uncertainty dynamically prioritizes the most difficult tasks. As also discovered in MTL vision work (Guo et al. 2018), this type of prioritization on more difficult tasks may explain MT-Uncertainty’s improved performance over other task selection methods.

While the EDM difficulty measure, is shown to correlate well with model performance, it lacks precision. As reported in Collins et al. (2018), the average score achieved on the Yahoo Answers dataset is 69.9% and its difficulty is 4.51. The average score achieved on Yelp Full is 56.8%, 13.1% less than Yahoo Answers and its difficulty is 4.42. The authors mention that “This indicates that the difficulty measure in its current incarnation may be more effective at assigning a class of difficulty to datasets, rather than a regression-like value”.

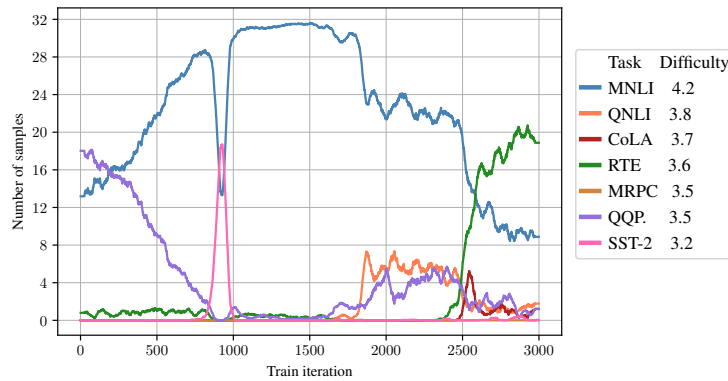

Figure 6: Task composition of MT-Uncertainty sampling and estimated task difficulty using EDM: number of training samples per task at each iteration for batch size of 32. The occurrence of first peaks and estimated difficulty follow the same order: From highest to lowest: MNLI > CoLA > RTE > QQP = MRPC > SST-2.

### 621 A.3 DATASET DESCRIPTION

622 The datasets that were used for the domain adaption experiments were SciTail<sup>5</sup> and SNLI<sup>6</sup>. We jointly  
 623 trained a CA-MTL<sub>ROBERTA-LARGE</sub> model on 9 GLUE tasks, 8 Super-GLUE<sup>7</sup> tasks, 6 MRQA<sup>8</sup> tasks,  
 624 and on WNUT2017<sup>9</sup> (Derczynski et al. 2017).

625 All GLUE tasks are binary classification, except STS-B (regression) and MNLI (three classes). We  
 626 used the same GLUE data preprocessing as in Devlin et al. (2018).

<sup>4</sup><https://github.com/Wluper/edm>

<sup>5</sup><https://allenai.org/data/scitail>; Leaderboard can be found at: <https://leaderboard.allenai.org/scitail/submissions/public>

<sup>6</sup><https://nlp.stanford.edu/projects/snli/>

<sup>7</sup><https://super.gluebenchmark.com/tasks>

<sup>8</sup><https://github.com/mrqa/MRQA-Shared-Task-2019>

<sup>9</sup>[https://github.com/leondz/emerging\\_entities\\_17](https://github.com/leondz/emerging_entities_17)

Table 7: GLUE (Wang et al., 2018) dataset description.

References: <sup>1</sup>Warstadt et al. (2018), <sup>2</sup>Socher et al. (2013), <sup>3</sup>Dolan & Brockett (2005), <sup>4</sup>Cer et al. (2017), <sup>5</sup>Williams et al. (2018), <sup>6</sup>Wang et al. (2018), <sup>7</sup>Levesque (2011)

| Acronym            | Corpus                                | Train | Task                 | Domain          |
|--------------------|---------------------------------------|-------|----------------------|-----------------|
| CoLA <sup>1</sup>  | Corpus of Linguistic Acceptability    | 8.5K  | acceptability        | miscellaneous   |
| SST-2 <sup>2</sup> | Stanford Sentiment Treebank           | 67K   | sentiment detection  | movie reviews   |
| MRPC <sup>3</sup>  | Microsoft Research Paraphrase Corpus  | 3.7K  | paraphrase detection | news            |
| STS-B <sup>4</sup> | Semantic Textual Similarity Benchmark | 7K    | textual similarity   | miscellaneous   |
| QQP                | Quora Question Pairs                  | 364K  | paraphrase detection | online QA       |
| MNLI <sup>5</sup>  | Multi-Genre NLI                       | 393K  | inference            | miscellaneous   |
| RTE <sup>6</sup>   | Recognition Textual Entailment        | 2.5K  | inference/entailment | news, Wikipedia |
| WNLI <sup>7</sup>  | Winograd NLI                          | 634   | coreference          | fiction books   |

Table 8: Super-GLUE (Wang et al., 2019b) dataset description. References: <sup>1</sup>Clark et al. (2019a), <sup>2</sup>de Marneffe et al. (2019), <sup>3</sup>Gordon et al. (2012), <sup>4</sup>Khashabi et al. (2018), <sup>5</sup>Zhang et al. (2018), <sup>6</sup>Wang et al. (2019b), <sup>7</sup>Poliak et al. (2018), <sup>8</sup>Levesque (2011)

| Acronym              | Corpus                                          | Train | Task                      | Domain                    |
|----------------------|-------------------------------------------------|-------|---------------------------|---------------------------|
| BoolQ <sup>1</sup>   | Boolean Questions                               | 9.4K  | acceptability             | Google queries, Wikipedia |
| CB <sup>2</sup>      | CommitmentBank                                  | 250   | sentiment detection       | miscellaneous             |
| COPA <sup>3</sup>    | Choice of Plausible Alternatives                | 400   | paraphrase detection      | blogs, encyclopedia       |
| MultiRC <sup>4</sup> | Multi-Sentence Reading Comprehension            | 5.1K  | textual similarity        | miscellaneous             |
| ReCoRD <sup>5</sup>  | Reading Comprehension and Commonsense Reasoning | 101K  | paraphrase detection      | news                      |
| RTE <sup>6</sup>     | Recognition Textual Entailment                  | 2.5K  | inference                 | news, Wikipedia           |
| WiC <sup>7</sup>     | Word-in-Context                                 | 6K    | word sense disambiguation | WordNet, VerbNet          |
| WSC <sup>8</sup>     | Winograd Schema Challenge                       | 554   | coreference resolution    | fiction books             |

Table 9: MROA (Fisch et al., 2019) dataset description. References: <sup>1</sup>Rajpurkar et al. (2016a), <sup>2</sup>Trischler et al. (2017), <sup>3</sup>Joshi et al. (2017), <sup>4</sup>Dunn et al. (2017), <sup>5</sup>Yang et al. (2018), <sup>6</sup>Kwiatkowski et al. (2019)

| Acronym                        | Corpus              | Train  | Task                   | Domain       |
|--------------------------------|---------------------|--------|------------------------|--------------|
| SQuAD <sup>1</sup>             | Stanford QA Dataset | 86.6K  | crowdsourced questions | Wikipedia    |
| NewsQA <sup>2</sup>            | NewsQA              | 74.2K  | crowdsourced questions | news         |
| TriviaQA <sup>3</sup>          | TriviaQA            | 61.7K  | trivia QA              | web snippets |
| SearchQA <sup>4</sup>          | SearchQA            | 117.4K | Jeopardy QA            | web snippets |
| HotpotQA <sup>5</sup>          | HotpotQA            | 72.9K  | crowdsourced questions | Wikipedia    |
| Natural Questions <sup>6</sup> | Natural Questions   | 104.7K | search logs            | Wikipedia    |

SuperGLUE has a more diverse task format than GLUE, which is mostly limited to sentence and sentence-pair classification. We follow the same preprocessing procedure as in Wang et al. (2019b). All tasks are binary classification tasks, except CB (three classes). Also, WiC and WSC are span based classification tasks. We used the same modified MRQA dataset and preprocessing steps that were used in Joshi et al. (2019). All MRQA tasks are span prediction tasks which seeks to identify start and end tokens of an answer span in the input text.

Table 10: SNLI (Bowman et al., 2015) and SciTail (Khot et al., 2018) datasets description.

| Acronym              | Corpus                              | Train  | Task       | Domain                               |
|----------------------|-------------------------------------|--------|------------|--------------------------------------|
| SNLI <sup>1</sup>    | Stanford Natural Language Inference | 550.2k | inference  | human-written English sentence pairs |
| SciTail <sup>2</sup> | Science and Entailment              | 23.5K  | entailment | Science question answering           |

SNLI is a natural inference task where we predict three classes. Examples of three target labels are: Entailment, Contradiction, and Neutral (irrelevant). SciTail is a textual entailment dataset. The hypotheses in SciTail are created from multiple-choice science exams and the answers candidates (premise) are extracted from the web using information retrieval tools. SciTail is a binary true/false classification tasks that seeks to predict whether the premise entails the hypothesis. The two datasets are used only for domain adaptation in this study (see section A.5 for the details of our approach).

#### 639 A.4 CATASTROPHIC FORGETTING

640 The datasets in the GLUE benchmark offers a wide range of dataset sizes. In MTL, heuristics to  
 641 balance tasks during training is typically done by weighting each task’s loss differently. We have  
 642 investigated in preceding section MT-Uncertainty was able to prioritize task difficulty. Now, we see  
 643 if MT-Uncertainty can help keep a low resource task performance steady and avoid catastrophic  
 644 forgetting. Our experimental set-up is the same as in section 4.1. In Figure 6, we compare our method  
 645 with Random sampling (see equation 6). With Random sampling, CoLA’s dataset is seen completely  
 646 by iteration 500 and the task performance starts to decrease. On the other hand, MT-Uncertainty  
 647 samples the task whenever it’s Shannon Entropy is high.

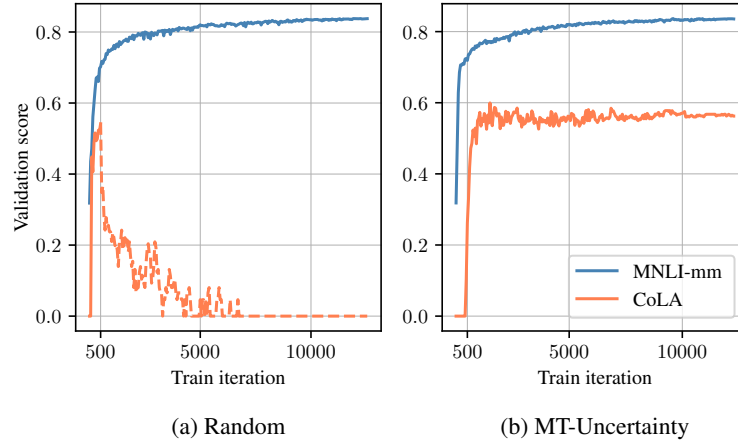

Figure 7: Illustrating catastrophic forgetting with two tasks in the first epoch: With a random sampling strategy, all of CoLA’s tasks are sampled by iteration 500, at which point the larger MNLI dataset overtakes the learning process. With MT-Uncertainty sampling, CoLA is sampled whenever Shannon entropy is high but not necessarily at every iteration, allowing lower resource tasks to avoid catastrophic forgetting.

#### 648 A.5 ZERO-SHOT RESULTS ON SciTAIL AND SNLI

Table 11: CA-MTL is flexible and extensible to new tasks. However, CA-MTL is sensitive to the new task’s embedding. We tested multiple task embeddings that worked best on either SciTail or SNLI by checking performance in a zero shot setting or using 0% of the data.

| Initialization of new task embedding layer | SciTail<br>0% of data | SNLI<br>0% of data |
|--------------------------------------------|-----------------------|--------------------|
| CoLA init                                  | 43.0                  | 34.0               |
| MNLI init                                  | 24.2                  | 33.0               |
| MRPC init                                  | 34.5                  | <b>45.5</b>        |
| STS-B init                                 | <b>46.9</b>           | 33.2               |
| SST-2 init                                 | 25.8                  | 34.2               |
| QQP init                                   | 31.7                  | 37.3               |
| QNLI init                                  | 32.0                  | 38.0               |
| RTE init                                   | 32.3                  | 40.6               |
| WNLI init                                  | 29.0                  | 30.4               |
| Average init                               | 28.7                  | 37.7               |
| Random init                                | 46.8                  | 34.0               |
| Xavier init                                | 29.8                  | 37.6               |

649 Before testing models on domain adaptation in section 4.2, we ran zero-shot evaluations on the  
 650 development set of SciTail and SNLI. Table 11 outlines CA-MTL<sub>BERT-BASE</sub>’s zero-shot transfer  
 651 abilities when pretrained on GLUE with our MTL approach. We expand the task embedding layer  
 652 to accommodate an extra task and explore various embedding initialization. We found that reusing  
 653 STS-B and MRPC task embeddings worked best for SciTail and SNLI respectively.

## A.6 NAMED ENTITY RECOGNITION (NER) RESULTS

We report NER task results on the WNUT2017 dataset in table 12. As with the other 23 tasks (see section 4.2) that we *jointly* trained our 24-task CA-MTL<sub>RoBERTa-LARGE</sub> model, we did not use fine-tuning or assemble methods on WNUT2017. We compare with the latest state-of-the-art models. Note that Nguyen et al. (2020) used RoBERTa<sub>LARGE</sub> (Liu et al., 2019c) and XLM-R<sub>LARGE</sub> (Conneau et al., 2020) as large model baselines. CA-MTL<sub>RoBERTa-LARGE</sub> outperforms XLM-R<sub>LARGE</sub> by 1.6% WNUT2017 F1 score. Except for the BLSTM-CRF-MTL (Aguilar et al., 2019) model and our method, all methods use single task fine-tuning.

Table 12: WNUT2017 test F1 results (entity level) on the NER task. Results taken from: <sup>1</sup>Aguilar et al. (2019), <sup>2</sup>Zhou et al. (2019), <sup>3</sup>Nguyen et al. (2020)

| SOTA Models                            | F1          |
|----------------------------------------|-------------|
| BLSTM-CRF-MTL <sup>1</sup>             | 41.9        |
| DATNet <sup>2</sup>                    | 42.3        |
| BERTweet <sup>3</sup>                  | 56.5        |
| RoBERTa <sub>LARGE</sub> <sup>3</sup>  | 56.9        |
| XLM-R <sub>LARGE</sub> <sup>3</sup>    | 57.1        |
| CA-MTL <sub>RoBERTa-LARGE</sub> (ours) | <b>58.0</b> |

## A.7 MORE EXPERIMENTAL DETAILS

For Figure 5 and Table 5 all BERT-based model have half their layers frozen (untrained) for a fair comparison of ablation results.
